# 1 **The energy requirements of ion homeostasis determine the lifespan of starving** 2 **bacteria**

3 Severin Schink<sup>1, #</sup>, Mark Polk<sup>1</sup>, Edward Athaide<sup>1</sup>, Avik Mukherjee<sup>1</sup>, Constantin Ammar<sup>1,2</sup>, Xili Liu<sup>1</sup>, Seungeun Oh<sup>1</sup>,  
4 Yu-Fang Chang<sup>1</sup>, and Markus Basan<sup>1, #</sup>

5  
6 <sup>1</sup> Systems Biology Department, Harvard Medical School, 200 Longwood Ave, 02115 MA, USA

7 <sup>2</sup> Department of Informatics, Ludwig-Maximilians-Universität München, Amalienstrasse 17, 80333 München,  
8 Germany

9 # Correspondence: [severin\\_schink@hms.harvard.edu](mailto:severin_schink@hms.harvard.edu) and [markus@hms.harvard.edu](mailto:markus@hms.harvard.edu)

10

## 11 **Abstract**

12 **The majority of microbes on earth, whether they live in the ocean, the soil or in animals, are**  
13 **not growing, but instead struggling to survive starvation<sup>1-6</sup>. Some genes and environmental**  
14 **conditions affecting starvation survival have been identified<sup>7-13</sup>, but despite almost a century**  
15 **of study<sup>14-16</sup>, we do not know which processes lead to irreversible loss of viability, which**  
16 **maintenance processes counteract them and how lifespan is determined from the balance of**  
17 **these opposing processes. Here, we used time-lapse microscopy to capture and characterize**  
18 **the cell death process of *E. coli* during carbon starvation for the first time. We found that a**  
19 **lack of nutrients results in the collapse of ion homeostasis, triggering a positive-feedback**  
20 **cascade of osmotic swelling and membrane permeabilization that ultimately results in lysis.**  
21 **Based on these findings, we hypothesized that ion transport is the major energetic**  
22 **requirement for starving cells and the primary determinant of the timing of lysis. We**  
23 **therefore developed a mathematical model that integrates ion homeostasis and ‘cannibalistic’**  
24 **nutrient recycling from perished cells<sup>16,17</sup> to predict lifespan changes under diverse**  
25 **conditions, such as changes of cell size, medium composition, and prior growth conditions.**  
26 **Guided by model predictions, we found that cell death during starvation could be**  
27 **dramatically slowed by replacing inorganic ions from the medium with a non-permeating**  
28 **osmoprotectant, removing the cost of ion homeostasis and preventing lysis. Our quantitative**  
29 **and predictive model explains how survival kinetics are determined in starvation and**  
30 **elucidates the mechanistic underpinnings of starvation survival.**

31

## 32 **Results**

33 Starving microbes undergo a gradual decrease in viability that can resemble exponential decay  
34 <sup>2,14,15,17–20</sup>. While the rate and specific dynamics of the initial decay can depend on the type of  
35 starvation (Fig. S1A) and on the organism (Fig S1B), the overall phenotype of exponential decay  
36 is remarkably conserved.

37

38 To uncover the molecular mechanisms underlying this universal phenomenon, we focused on the  
39 exponential decay of viability of *Escherichia coli* K-12 in carbon starvation, where cultures lose  
40 about 99.9% of viability within 10 days (Fig. 1A). We first asked which biosynthetic processes are  
41 important for starvation survival. We measured survival dynamics in batch, while inhibiting  
42 several major cellular biosynthetic processes with different antibiotics (Fig. 1B). Strikingly, the  
43 only treatment that led to an accelerated decrease in viability and eventually extinction of the  
44 culture was the inhibition of fatty acid synthesis with cerulenin, indicating a role of the plasma  
45 membrane in starvation survival.

46

47 To determine the causes of loss of viability in starvation, we imaged individual bacteria during  
48 starvation with live-cell, time-lapse microscopy, using a membrane potential dye as a readout for  
49 ion homeostasis; see Methods. We found that within a few hours after nutrient depletion, the  
50 cytoplasm of *E. coli* contracted and detached from the cell wall at the poles (Fig. 1C, image at 16  
51 h; Fig. S2A&B - quantification and statistics, Fig. S2C&D - SEM & TEM), a process called  
52 plasmolysis that is typical for bacteria in starvation<sup>18,21</sup>. By continuing to track starving bacteria  
53 for seven days, we captured the death process in thousands of bacteria: spontaneous depolarization  
54 of the cytoplasm was rapidly followed by swelling and lysis (Fig. 1C, 26 h & 26.3 h; Fig. 1D).  
55 Swelling of the cytoplasm led to stretching of the cell envelope, indicated by an increase in cell  
56 length (Fig. 1E, Fig. S2E&F), and lysis led to a sudden loss of biomass (Fig. 1F, Fig. S2G&H).  
57 Analyzing the succession of events, we found that the collapse of membrane potential coincided  
58 with cytoplasmic expansion ( $-0.05 \pm 0.50$  h, Fig. S2F) and preceded lysis ( $2.0 \pm 1.4$  h, Fig. S2H).  
59 This led us to hypothesize that the uncontrolled expansion is caused by a catastrophic failure of  
60 ion homeostasis, resulting in a build-up of osmotic pressure and eventually lysis. We next stained  
61 bacteria with propidium iodide (PI), a non-toxic stain (Fig. S3A) that intercalates irreversibly with

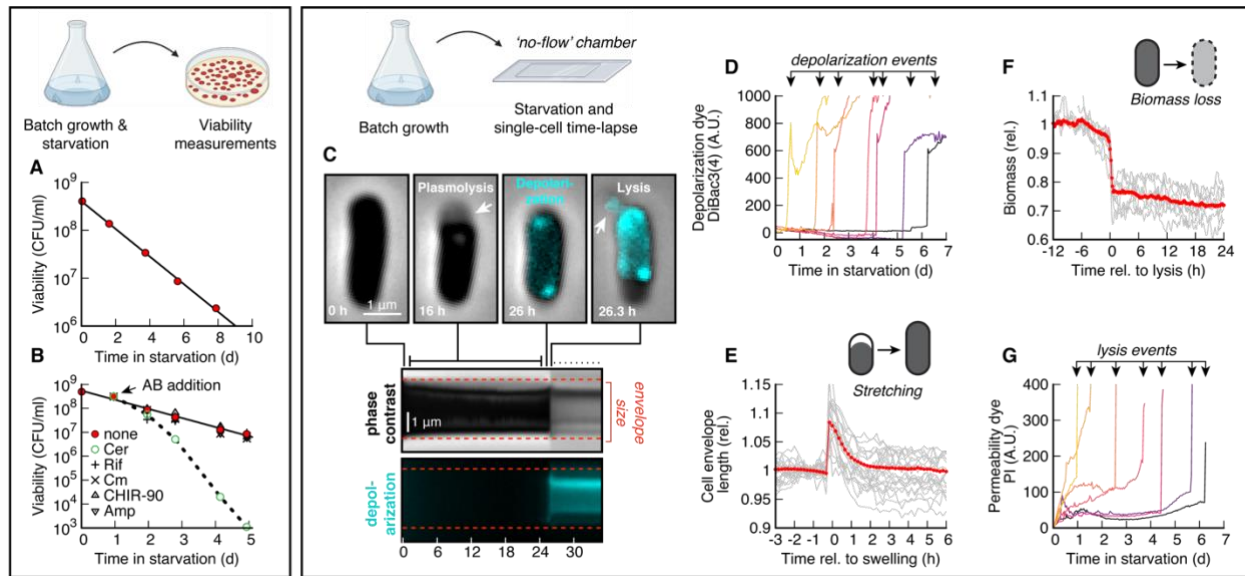

**Figure 1. Survival dynamics of *E. coli* in carbon starvation.** (A) Viability of *E. coli* K-12 NCM3722 in N+C- minimal medium (batch). Growth medium supplemented with 0.1% glucose; starvation induced by medium switch; viability measured in colony forming units (CFU/ml) (Methods). Line: Exponential fit. Data points are an average of n=3 replicates. (B) Viability of control (red) compared to cerulenin (Cer, fatty acid synthesis), rifaximin (Rif, transcription), chloramphenicol (Cm, translation), CHIR-90 (lipid-A synthesis) and ampicillin (Amp, cell wall synthesis). Antibiotics were added daily, starting at 24 h at 10x MIC. Data points are an average of n=3 replicates. (C) Live-cell imaging of *E. coli* in a ‘no-flow’ chamber (Methods). Plasmolysis, the retraction of cytoplasmic membrane from cell envelope, lasted from the first hours of starvation until shortly before death (see Kymograph). During plasmolysis, the cytoplasm spontaneously depolarizes (cyan DiBac3(4) signal turns on at 26 h), which coincides with swelling (Fig. S2E&F). Finally, the bacterium lyses (‘arrow’ at 26.3 h), which is typically delayed from swelling (Fig. S2G-H). Total # of bacteria: 14.498. (D) Single cell traces of seven representative bacteria dying on different days show a sudden spike signal, indicating rapid loss of ion homeostasis. (E) Cell envelope length of single cells, aligned to time-point of swelling (‘grey’; mean in ‘red’). # of bacteria: 858. (F) Single-cell biomass, measured with quantitative phase microscopy (QPM; Methods) aligned to time-point of lysis. Loss of biomass:  $28 \pm 7$  % (Fig. S2G). # of bacteria: 34. (G) Single-cell traces of fluorescence signal of propidium iodide (PI) of the seven cells of panel C. Permeability is measured as the slope of the staining dynamics. See Fig. S4 for combined DiBac3(4) and PI traces of individual bacteria.

62 DNA (Fig. S3B&C), which allows us to use it as a metric for cell permeability (see Fig. S3D, E).  
 63 We found that PI diffuses through the membrane at a slow rate during starvation, indicating that  
 64 the membrane is slightly permeable in viable bacteria, but shows a sharp increase when bacteria  
 65 lyse (Fig. 1G).

66

67 To investigate the morphology of the cell envelope, and in particular the inner membrane, we also  
68 performed transmission electron micrography (TEM) during starvation survival. Electron  
69 microscopy revealed dramatic changes of membrane morphology. While early in starvation there  
70 was excess cytoplasmic membrane, after 48 h in starvation the excess material had vanished and  
71 the shape of the membrane at the pole was nearly half-spherical, indicating tension on the  
72 membrane (Fig. S2C).

73  
74 Based on these observations, we hypothesized that maintaining ion homeostasis and membrane  
75 integrity are the two most important processes that prevent lysis of starving bacteria. The role of  
76 membrane integrity is straightforward to understand, but the role of ion homeostasis is less obvious.  
77 However, all cells must actively transport inorganic ions out of their cytoplasm to reduce their  
78 internal solute concentration. If this process fails, the excess concentrations of metabolites,  
79 macromolecules and counterions inside the cell leads to the influx of water, swelling and lysis<sup>22,23</sup>.  
80 Therefore, maintaining osmolarity to prevent swelling is a continuous process that consumes  
81 energy that is in short supply during starvation. If our hypothesis is correct, this would suggest that  
82 maintenance of ion homeostasis is the largest indispensable energy cost of starving cells.

83  
84 To test whether these ideas are sufficient to explain the key experimental observations on starving  
85 bacterial populations, we devised a simple mathematical model (Fig. 2A). One important goal for  
86 the model was to explain how the exponential decay of viability of Fig. 1A emerges from the  
87 seemingly random time to death of single cells, as observed in Fig. 1D. The model assumes that  
88 ions from the medium (red, coarse-grained into a single species) diffuse into the cytoplasm and  
89 are exported using active transport, which consumes energy provided by nutrients (green); see Eq.  
90 (1). Nutrients released from dying cells are cannibalized and provide an energy source to surviving  
91 cells<sup>16,17</sup>; see Eq. (2). Based on experimental findings<sup>24–26</sup>, we also assumed that membrane  
92 permeability is increased by membrane tension. Biological fluctuations in permeability and  
93 pumping are integrated in a normal-distributed noise term.

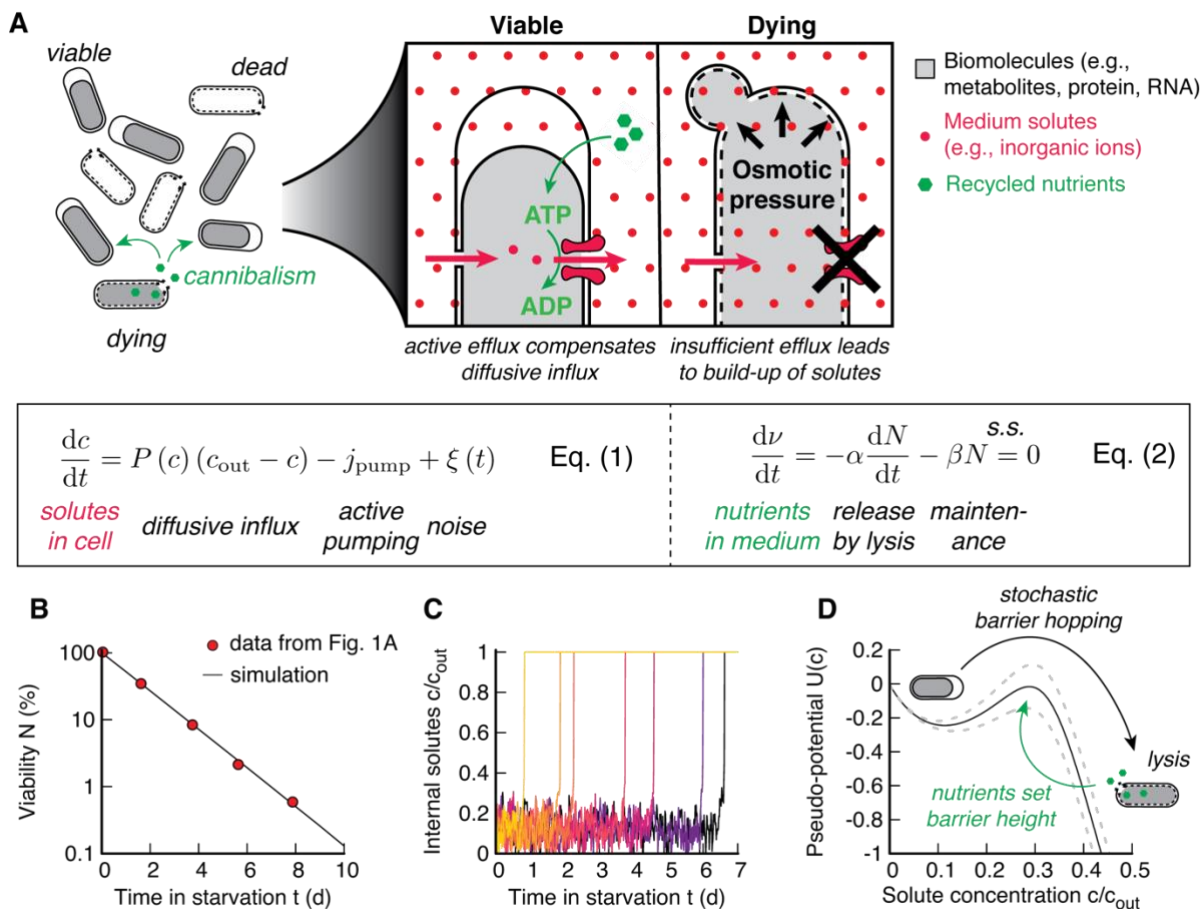

**Figure 2. Ion homeostasis maintenance model.** (A) Nutrients released by lysis are cannibalized by viable bacteria (left) and are used to pump out solutes (e.g., ions) from the cytoplasm to the medium (right). If sufficient nutrients are present to support pumping, then the cytoplasm contracts (plasmolysis) until the concentration of solutes from biomass balances  $c_{out}$ . Insufficient pumping leads to collapse of ion gradients, osmotic water inflow and swelling, resulting in lysis. The dynamics of internal solute concentration,  $c_{in}$ , (Eq. 1) are given by diffusive influx (Fick's law; permeability  $P$ , ion gradient  $\Delta c = c_{out} - c_{in}$ ), active pumping ( $j_{pump}$ , which is a part of the total maintenance  $\beta$ ), and normal-distributed noise  $\xi(t)$ . Stretching of the membrane by increased turgor pressure (i.e., decreased  $\Delta c$ ) increases  $P(\Delta c)$ . The dynamics of nutrients in the medium  $\nu$  is given by release of nutrients (recycling yield  $\alpha$ ), and maintenance  $\beta$ .  $N$  is the number of viable bacteria in the culture. In steady state 's.s.',  $\nu = const$ . See SI for details on the model. (B) Simulated loss of viability of  $10^5$  bacteria (black line) compared to experimental data from Fig. 1A. (C) Dynamics of single-cell solute concentration for bacteria dying at different time-points shows random variations around a small solute concentration, and a spontaneous loss of homeostasis, analog to Fig. 1D. (D) The model can be mapped onto a potential  $U(c)$ , 'black line', with  $dc/dt = -U'(c) + \xi(t)$ . Height of the barrier self-adjusts. Dashed lines show the effect of a 10% change in death rate on the potential barrier.

95 Simulations of this ‘ion homeostasis’ model closely matched experimental observations. Indeed,  
96 the model dynamics yielded an exponential decay in viability (Fig. 2B) and a spontaneous loss of  
97 ion homeostasis and death (Fig. 2C). This is because in the model, the spontaneous death process  
98 can be understood as a stochastic escape from a potential well (Fig. 2D), similar to the classic  
99 Kramer’s escape model in physics<sup>27</sup>. In the potential well, starving cells are in plasmolysis,  
100 minimizing tension on the membrane. But unlike in the classic Kramer’s escape model, the  
101 potential barrier itself is created by nutrients released from dying cells, i.e., cells that have crossed  
102 the potential barrier. This leads to a steady state where most bacteria are supplied with just enough  
103 nutrients to remain in the potential well, but the potential barrier remains small enough to let cells  
104 to escape the well at a low rate and provide nutrients to support surviving cells. Therefore, because  
105 the barrier height itself is set by the escape rate over the barrier, even small fluctuations in the  
106 underlying biological variables are sufficient to result in a highly stochastic exponential decay in  
107 viability; see SI. This closely resembles our experimental observations, where the vast majority of  
108 starving cells remain in plasmolysis (low internal ion concentration), but a subset stochastically  
109 undergoes expansion and lysis (ion influx and crossing the potential barrier).

110  
111 To experimentally test this model and the ion homeostasis mechanism it describes, we derived a  
112 set of quantitative predictions from the model. For bacteria that are in the potential well, the  
113 internal ion concentration  $c_{in}$  is in steady-state and ion efflux from active transport,  $j_{out}$ , is  
114 balanced by passive diffusive influx,  $j_{in}$ . Fick’s law of diffusion states that the diffusive influx  $j_{in}$   
115 is proportional to the concentration gradient of ions across the membrane,  $j_{in} = P\Delta c$ , where  $P$  is  
116 the permeability of the membrane and  $\Delta c = c_{out} - c_{in}$  is the ion gradient. Hence, the energy  
117 expenditure of bacteria for pumping ions, denoted by  $\beta$ , is given by,  $\beta = \kappa j_{out} = \kappa P\Delta c$ , where  $\kappa$   
118 is the pumping cost. On the other hand, energy for this active transport process comes from  
119 nutrients released by dying cells. If the death of a cell yields  $\alpha$  nutrients that are divided up equally  
120 among all  $N$  viable bacteria, and  $-\dot{N}$  are dying per unit time, then the rate at which a bacterium is  
121 supplied with nutrients is  $-\alpha \dot{N}/N = \alpha\gamma$ , where  $\gamma$  is the death rate. In nutrient-recycling steady-  
122 state,  $\dot{v} = 0$ , nutrient supply and nutrient demand balance, so  $\alpha\gamma = \beta$  and we obtain a quantitative  
123 relation for the death rate as a function of permeability, ion gradient and the recycling yield

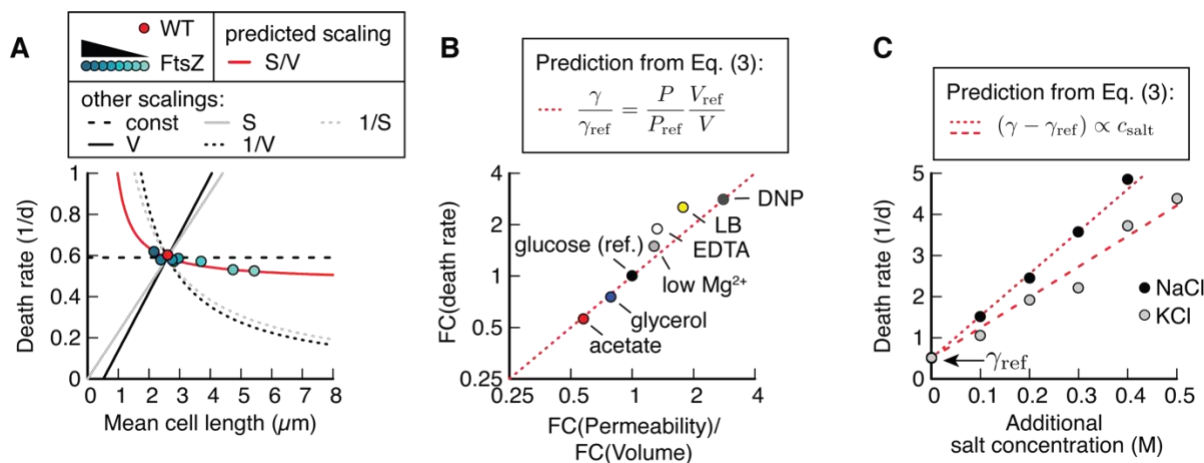

**Figure 3. Cost of ion homeostasis determines death rate.** (A) Death rate of wild-type and mutant *ptac-ftsZ<sup>27</sup>*, induced with varying levels of IPTG, resulting in a change in cell length (Fig. S6). Change of death rate compared to the predicted S/V scaling, and proportional or inverse scaling with either S or V. (B) Fold-change (FC) of death rate, measured in batch cultures plotted versus fold-change of mean permeability (Methods) times the inverse fold change of volume, both measured in time-lapse microscopy. Theoretical prediction: Unity line in dashed red. Reference condition: growth in minimal medium with glucose (black). Red, blue: supplemented with different carbon substrates (acetate or glycerol) during growth. Light-grey: Mg<sup>2+</sup> is changed during starvation from 0.4 mM to 0.1 mM. White: 1 mM EDTA added in starvation. Yellow: Growth on LB. Dark-grey: 1 mM DNP (di-nitrophenol) added in starvation. Death rates are measured as average of n=3. Permeability and volume changes are the average of 2.000 to 20.000 individual bacteria. (C) Death rate of cultures supplemented with either KCl or NaCl during starvation. Fit:  $R^2 = 0.99$  (NaCl),  $R^2 = 0.96$  (KCl).

$$\gamma = \frac{\kappa P \Delta c}{\alpha}. \quad (3)$$

124 In addition, in this simplified one-ion model, we assume that viable bacteria keep  $c_{\text{in}}$  low and  
 125 independent of  $c_{\text{out}}$  and  $P$ , based on the observation that bacteria keep concentrations of unwanted  
 126 ions low in a wide range of media, and balance osmotic pressure primarily with glutamate and  
 127 potassium<sup>28</sup>.

128  
 129 Eq. (3) makes predictions about how lifespan should scale with cell size. Permeability  $P$  is  
 130 proportional to the cell surface area  $S$ , because diffusion happens across the cell membrane, while  
 131 the recycling yield  $\alpha$  is proportional to cell volume  $V$ , because bigger cells release more nutrients<sup>20</sup>.  
 132 Thus, according to Eq. (3), death rate should scale with the surface-to-volume ratio of bacteria,

133  $\gamma \propto S/V$ , if all other factors are kept constant. There are plausible alternative hypotheses for the  
134 reasons for cell death that would result in markedly different scaling. For example, if death was  
135 caused by a single, rare catastrophic event, such as damage of the cell membrane or accumulation  
136 of a toxic protein aggregate, death would be more likely for larger cells. Thus, we would expect  
137 scaling of death rate to be proportional to membrane material,  $\gamma \propto S$ , or cytoplasmic material,  $\gamma \propto$   
138  $V$ . On the other hand, if death is caused by a gradual deterioration of either the cell's membrane or  
139 its cytoplasmic material, a bigger cell would survive longer and death rate would decrease  
140 proportional either to the inverse of membrane material,  $\gamma \propto S^{-1}$ , or to the inverse of the total  
141 cytoplasmic material,  $\gamma \propto V^{-1}$ .

142

143 To test whether these alternatives are better explanations of cell death during survival than our ion  
144 homeostasis model, we varied cell length of *E. coli* using a titratable expression construct of the  
145 cell division protein FtsZ<sup>29</sup> (Fig. S6). Remarkably, we observed an almost constant death rate,  
146 despite a 2.5-fold variation in average length (Fig. 3A) that is clearly incompatible with the scaling  
147 expected from the alternative models (black lines). Moreover, FtsZ-deprived cells also typically  
148 contain several copies of chromosomal DNA<sup>30</sup>, which suggests that DNA damage is unlikely to  
149 be the death mechanism. Instead, the slight decrease of death rate in longer cells closely matches  
150 the estimated surface-to-volume ratio of rod-shaped bacteria, precisely as predicted by Eq. (3) (Fig.  
151 3A, red line).

152

153 To further investigate the ion homeostasis model's predictions, we wondered if differences in death  
154 rates that are observed when bacteria are grown in different conditions could be explained by Eq.  
155 (3). Different growth conditions prior to starvation are known to affect maintenance rate for  
156 unknown reasons<sup>20</sup>. These changes in death rate are not accounted for by a change in  $S/V$  because  
157  $S/V$  decreases for faster growth (because cells become bigger), while death rate increases. Based  
158 on Eq. (3), we suspected that these changes in death rate might instead be caused by changes in  
159 bacterial permeability. To test this, we cultured *E. coli* in different growth media, washed them  
160 and resuspended them in carbon free medium. From Eq. (3), the fold change (FC) of death rate  
161 should be reflected in the fold changes of permeability and volume,  $FC(\gamma) = FC(P) FC^{-1}(V)$ .  
162 Indeed, quantifying average permeability for these starvation conditions, using the slope of PI  
163 staining (Fig. 1F) between 0 and 10 h, showed that the change of death rate in slow-growth carbons



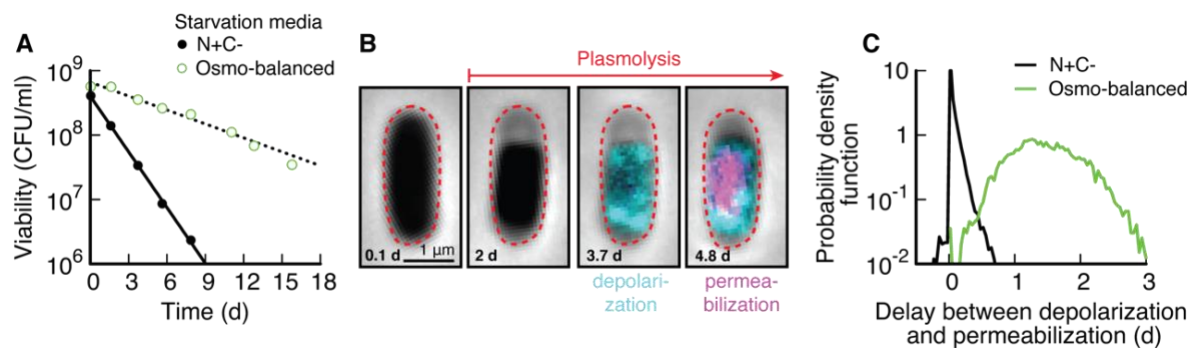

**Figure 4. Rescued survival dynamics in ‘osmo-balanced’ medium.** (A) Comparison of viability (batch) of cultures grown in N+C+ and starved in either N+C- (black, data from Fig. 1A.) or ‘osmo-balanced’ medium (green). Death rate decreased 4.0-fold.  $n=3$ . (B) Time-lapse images of *E. coli* in ‘osmo-balanced’ medium. After depolarization, the cytoplasm does not swell and the bacterium does not lyse. (C) Delay distribution between depolarization and permeabilization. In N+C- medium (‘black’) both events are in rapid succession, while in ‘osmo-balanced’ medium (‘green’) the events are disconnected by  $1.5 \pm 0.5$  days. In addition, in the ‘osmo-balanced’ medium both depolarization and permeabilization are gradual (Fig. S8), compared to the rapid rate of both processes in N+C- (Fig. S4). N+C-: 14.498 Osmo-balanced: 11.023 bacteria.

164 and rich media could be explained solely by the effect on permeability and volume (Fig. 3B). To  
 165 further test the causality of the effect of permeability on death rate, we permeabilized *E. coli* with  
 166 low  $Mg^{2+}$ , EDTA or DNP. These higher permeabilities were reflected in faster death rates (Fig.  
 167 3B). Death rates for all experimental conditions closely followed the model prediction of Eq. (3)  
 168 (Fig. 3B, identity line in red).

169  
 170 Finally, the ion homeostasis maintenance model makes the prediction that death rate should  
 171 depend on the medium composition. According to Eq. (3) increasing the external ion concentration  
 172  $c_{out}$  should linearly increase death rate because an increase in ion gradients leads to an increase in  
 173 diffusive influx, which needs to be balanced with a higher pumping rate to keep the internal ion  
 174 concentration low. Indeed, as predicted, supplementing the medium with either NaCl or KCl led  
 175 to a striking linear increase in death rate, up to a 10-fold increase at 0.5 M for both salts (Fig. 3C).

176  
 177 For a final test, we asked if it would be possible to reduce death rates by lowering salt  
 178 concentrations in the medium. Consistent with our earlier observations, decreasing the  
 179 concentration of our phosphate-buffered minimal medium (N+C-) decreased death rate, but only  
 180 by about a third, before increasing again at low osmolarity (Fig. S7). This can easily be understood

181 by considering that a minimum level of external osmotic pressure is crucial to balance the internal  
182 osmotic pressure from metabolites, biomolecules and cellular counterions, in order to prevent cell  
183 swelling.

184

185 Guided by our model, we reasoned that it should be possible to overcome this limitation of cell  
186 survival in low-salt medium by balancing cellular osmotic pressure with external osmotic pressure  
187 from an impermeable osmolyte. The low-salt medium should minimize the energy cost required  
188 to pump out ions, while the cellular osmotic pressure would be balanced by an external osmolyte  
189 to prevent lysis. We therefore devised a new ‘osmo-balanced’ medium that consists of 0.2 M  
190 MOPS, an inert and impermeable buffer molecule, and low quantities of essential ions; see  
191 Methods. We grew *E. coli* in our regular medium to ensure an identical cell state before starvation,  
192 then washed and resuspended the bacteria in the ‘osmo-balanced’ medium. Remarkably, this  
193 medium led to a 4-fold decrease in death rate compared to our regular culture conditions (Fig. 4A).  
194 This improvement of survival was not unique to *E. coli*; other bacterial species showed similarly  
195 improved starvation survival in our osmo-balanced medium (Fig. S1C&D). Together, the findings  
196 in Fig. 4A and Fig. 3C demonstrate that starvation survival can be controlled across a more than  
197 40-fold range of death rate, simply by changing medium salt concentrations.

198

199 To confirm that our ‘osmo-balanced’ medium prevented cytoplasmic swelling, we performed live-  
200 imaging of *E. coli*. Several days into starvation, bacteria began to depolarize, presumably due to  
201 lack of energy. However, depolarized bacteria remained in plasmolysis and did not swell and lyse  
202 (Fig. 4B). Most bacteria eventually permeabilized, but only several days after the loss of membrane  
203 potential, as opposed to the two events coinciding, as occurred in our regular culture medium (Fig.  
204 4C). Depolarization and permeabilization happened gradually (Fig. S8) rather than abruptly as in  
205 regular minimal medium (Fig. S4). Thus, the osmo-balanced medium disrupted the normal death  
206 process and decoupled depolarization from osmotic swelling and lysis. Unsurprisingly, bacteria  
207 did not survive indefinitely in the osmo-balanced medium, which indicates that while ion  
208 homeostasis is the major energy-consuming process in starvation, secondary processes also play a  
209 role in survival, for example membrane turnover (see Fig. 1B).

210

211 Our results show that maintenance of ion homeostasis is the major energetic cost limiting bacterial  
212 survival in starvation. Moreover, failure of ion homeostasis, triggered by a lack of energy, is the  
213 cause of death of starving bacteria. The ion homeostasis maintenance model introduced here  
214 explains how the stochastic exponential survival dynamics of single bacteria during starvation  
215 emerge from the collective phenomena of maintenance and nutrient exchange. The model enables  
216 quantitative predictions of how survival rates are affected by diverse environmental conditions and  
217 bacterial adaptations. Based on our findings, we propose that targeting ion homeostasis could be a  
218 promising avenue for developing novel antibiotics against non-growing and dormant infections,  
219 for which currently available antibiotics are often ineffective. Finally, because most microbes on  
220 earth spend most of their time in starvation conditions, we expect the principles underlying  
221 starvation survival elucidated in this work, to be of broad relevance for understanding the  
222 evolutionary strategies that contribute to the striking diversity of phenotypes of microbes and  
223 microbial communities in different natural ecological niches.

224

#### 225 **Acknowledgements**

226 This project was supported by MIRA grant (5R35GM137895) and an HMS Junior Faculty  
227 Armenise grant to MB. SJS was supported by EMBO via a Long-term fellowship (ALTF 782-  
228 2017) and HFSP via a long-term fellowship (LT000597/2018). MP was supported by the Harvard  
229 College Research Program (HCRP). EA was supported by HCRP and the Program for Research  
230 in Science and Engineering (PRISE) of Harvard. Microscopy was performed at the Nikon Imaging  
231 Center at Harvard Medical School. Electron microscopy was performed at the Center for  
232 Nanoscale Systems at Harvard University. We thank Suckjoon Jun for sharing strain VIP205, Marc  
233 Kirschner for helping us with QPM microscopy and Rebecca Ward for many helpful suggestions.

234

#### 235 **Data availability**

236 All analyzed data are available in the supporting information. Raw microscopy data can be shared  
237 upon request.

238

#### 239 **Contributions**

240 SJS and MB conceived this study, designed experiments and theory. SJS performed the majority  
241 of experiments with contributions from MP in starvation experiments and microscopy, and AM in

242 electron microscopy and QPM imaging experiments. SJS, EA and MB performed modelling. SO  
243 contributed to the QPM instrumentation and SO and XL designed the QPM image processing  
244 pipeline. YFC constructed strains. CA contributed data analysis and ideas on membrane integrity.  
245 SJS and MB wrote the paper with input from MP, AM, EA, CA, XL & SO.

246

## 247 **Methods**

### 248 *Strains*

249 All strains used in this study are derived from wild type *E. coli* K-12 strain NCM3722<sup>31</sup>. To titrated  
250 FtsZ, the construct ptac::FtsZ of strain VIP205<sup>29</sup> was transferred to NCM3722 via P1 transduction.  
251 Bacteria used in Fig. S1 are environmental isolates kindly provided by the lab of Roberto Kolter.

252

### 253 *Culture medium*

254 In this work we used two distinct culture media. Our standard medium was N-C- minimal  
255 medium<sup>32</sup>, containing K<sub>2</sub>SO<sub>4</sub> (1 g), K<sub>2</sub>HPO<sub>4</sub>·3H<sub>2</sub>O (17.7 g), KH<sub>2</sub>PO<sub>4</sub> (4.7 g), MgSO<sub>4</sub>·7H<sub>2</sub>O  
256 (0.1 g) and NaCl (2.5 g) per liter. The medium was supplemented with 20 mM NH<sub>4</sub>Cl, as nitrogen  
257 source, and 0.1% glucose as the sole carbon source, unless indicated otherwise. For carbon or  
258 nitrogen starvation, N-C- minimal medium was prepared either without carbon (N+C-) or nitrogen  
259 supplement (N-C+), respectively. The second medium is our ‘osmo-balanced’ medium, which  
260 contains 0.2 M MOPS (3-(N-morpholino)propanesulfonic acid), titrated to pH 7 with KOH, and 1  
261 mM MgCl<sub>2</sub>, 0.1 mM CaCl<sub>2</sub>, 0.16 mM K<sub>2</sub>SO<sub>4</sub>, 0.5 mM K<sub>2</sub>HPO<sub>4</sub>, 22mM NH<sub>4</sub>Cl and lacks a carbon  
262 source. Cultures starved in the ‘osmo-balanced’ medium were previously grown in N-C- medium  
263 supplemented with NH<sub>4</sub>Cl and glucose.

264

### 265 *Growth protocol*

266 Growth was performed in batch cultures in glass test tubes (Fisher Scientific) with disposable,  
267 polypropylene Kim-Kap closures (Kimble Chase) in a water bath shaker kept at 37°C. Single  
268 colonies were picked from an LB agar plate, grown in LB until saturation and used to inoculate  
269 overnight cultures in N-C- minimal media supplemented with NH<sub>4</sub>Cl and glucose. Dilutions were  
270 chosen such that cultures did not saturate overnight to ensure continuous exponential growth. The  
271 next day, cultures were diluted into fresh minimal medium and grown for at least 5 doublings.  
272 Starvation was induced by centrifugation (5000 RCF for 3 min), removal of supernatant and

273 resuspension in fresh, carbon-free N-C- minimal medium or ‘osmo-balanced’ medium. This  
274 protocol was chosen to avoid bacteria using waste products such as acetate after glucose was  
275 depleted<sup>33</sup>. For nutrient sources without acetate excretion (e.g. glycerol), this washing step does  
276 not alter the survival kinetics<sup>17</sup>. To achieve ‘stationary phase’ adaptation we used the effect of  
277 excreted waste products and let *E. coli* grow on glucose until depletion, followed by washing 12 h  
278 to 24 h later.

279

### 280 *Viability counting*

281 Samples were diluted in fresh N-C- minimal medium without carbon substrate to an estimated  
282 target density of 4000 CFU/ml using a multi-channel pipette and a 96 well plate. 100 µl of the  
283 diluted culture were spread on LB Agar using Rattler Plating Beads (Zymo Research) and  
284 incubated for 24 h. LB Agar was supplemented with 25 µg/ml of 2,3,5-triphenyltetrazolium  
285 chloride to stain colonies red and increase contrast for automated colony counting using an  
286 automated CellProfiler pipeline<sup>34</sup>. Images were taken on a Rebel T3i (Canon) mounted on top of  
287 a Lightpad A920 (Artograph).

288

### 289 *Live-cell Microscopy*

290 To image individual bacteria for seven days, we designed a ‘no-flow’ chamber that minimizes  
291 nutrient contamination and evaporation. The chamber consists of a sandwich of a cover slip (22x50  
292 mm, No 1.5, VWR) and a microscope slide (3”x1”x1mm, VistaVision, VWR), with a thin layer  
293 of PDMS in-between. At the top and bottom, the culture is in contact with inert glass that prevents  
294 evaporation or leakage of nutrients from the plastic. Two holes are laser-cut into the microscope  
295 slide (Universal Laser Systems PLS 6.150D) through which the chamber will be filled. The PDMS  
296 layer (Sylgard 184, 1:10 ratio, Dow Corning) is spin coated on a silicon wafer for 30 s at 500 rpm  
297 (Laurell, WS-650MZ-23NPPB), cured at 85°C for 1 h, peeled off and gently draped over the  
298 microscope slide. Then, the incubation chamber is cut out of the PDMS with a laser cutter and  
299 unwanted PDMS pieces are removed from the microscope slide with tweezers. The resulting  
300 microscope slide with PDMS chamber is plasma treated 50 W, 10 s, O<sub>2</sub>, duty ratio 255 (Tergeo  
301 Plasma Cleaner, Pie Scientific) and the cover slide is added on top. The finished chamber is cured  
302 overnight at 85°C.

303

304 Cultures taken from exponential growth at OD 0.5 are starved according to the above protocol and  
305 stained with 5  $\mu\text{g/ml}$  DiBac3(4) and 1.25  $\mu\text{g/ml}$  Propidium Iodide (Thermo Fisher Scientific) 10  
306 minutes after entry to starvation. The ‘no-flow’ chamber was then filled with the stained, starved  
307 culture through the laser-cut holes with a starved culture at OD 0.5, identical to batch experiments.  
308 Holes are then sealed (AlumaSeal, Sigma-Aldrich) and the chamber is centrifuged, cover slide side  
309 down at 1200 RCF for 2 min, to adhere bacteria to the cover glass. The majority of bacteria stably  
310 adhered to the glass surface for seven days without coating. Apart from the filling and  
311 centrifugation period, which were at room temperature, the culture and chamber were kept at 37°C  
312 throughout the process.

313

314 Phase contrast and fluorescence microscopy was performed on a Nikon Ti-2 equipped with a 100 $\times$   
315 phase contrast immersion oil objective, Hamamatsu Flash 4.0 sCMOS camera, Lumencor Spectra-  
316 X light engine and OkoLab cage microscope incubator set to 37°C. To image the time-lapse, Nikon  
317 Elements was used to control illumination times (phase: 200ms, green 10 ms, red 10 ms.) and  
318 illumination strength (phase: 100%, green 10%, red 10%). A combination of perfect focus, a z-  
319 stack (4 steps of 0.4  $\mu\text{m}$ ) and a software autofocus (post-acquisition) were used to obtain  
320 continuous images of bacteria in focus.

321

322 Single cell dry mass was measured using quantitative phase microscopy (QPM) on a Nikon Eclipse  
323 Ti with a Nikon, CFI Plan Apo Lambda 100X objective with 1.5 N.A. an 2x magnifier lens  
324 (Thorlabs, EX2C extender) and a commercial phase sensor (Phasics, SID4bio). In the trans-  
325 illumination light path, a colored-glass bandpass filter (FGB39, Thorlabs) was mounted to select  
326 the blue light in order to increase the spatial resolution. This phase sensor enables single-shot  
327 acquisition of quantitative phase through quadriwave lateral shearing interferometry (QWLSI)<sup>35</sup>  
328 by using a 2-dimensional diffraction grating (modified Hartmann mask) positioned at a short  
329 distance from a CCD sensor. The raw image of quantitative phase, measured as optical path  
330 difference (OPD), is induced by both the sample and the optical system itself. We used the ceQPM  
331 method as reported previously<sup>36</sup> to obtain the OPD of the optical system and fit the background  
332 fluctuation that are then subtracted from the raw image to obtain the OPD of the cell. The dry mass  
333  $m$  is computed from the cell’s OPD through the relation  $m = 1/\alpha \cdot \oint \text{OPD}(x, y) dx dy$ , where  $\alpha =$   
334  $dn/dc$  is the average refractive index increment of cellular materials and the integral is over the

335 cell area  $S$ . We used  $\alpha = 0.18$  ml/g to convert the OPD to dry mass, which is the typical value for  
336 most cellular materials<sup>37</sup>.

337

338 Time-lapse was analyzed in MATLAB. First, regions of interests (ROIs) with an object in phase  
339 contrast resembling a bacterium were identified. Next, for every time-point, the correct focal plane  
340 was identified, the fluorescence background was subtracted, and the ROIs were cut out and saved  
341 separately. Finally, ROIs were analyzed and the total fluorescence (by summing up the value of  
342 all pixels), as well as length, width and area of the individual bacteria were recorded. For QPM  
343 analysis, the segmented bacterium was dilated and the total phase-shift was integrated to yield the  
344 total biomass. This analysis yielded 14,500 single-cell time-traces of bacteria starving in N-C-  
345 medium (Fig. 1) and 11,000 for the ‘osmo-balanced’ medium (Fig. 4).

346

#### 347 *Scanning electron microscopy protocol*

348 Culture was harvested by filtering 2 ml of exponentially growing or starving bacterial culture at  
349 0.5 OD through a 0.22-micron filter (Durapore 0.22  $\mu$ M PVDF membrane, Millipore  
350 GVWP02500) held on a vacuum micro-filtration device (25mm glass filter holder, Millipore  
351 XX1012502). Immediately after this step, the filter was submerged in Karnovsky fixative  
352 (Electron microscopy sciences 15732-10). Cells were dislodged from the filter by repeated but  
353 gentle pipetting with 1 ml pipette and kept in fixative solution for 1 hour at room temperature.  
354 After one hour, 500  $\mu$ l of fixative containing cells were added on 12 mm glass coverslip kept on a  
355 35mm petri plate (glass coverslips were precoated with Ploy-L-Lysine) and centrifuged in a swing  
356 bucket centrifuge (Eppendorf) for 10 min at 5000 g. After centrifugation, the glass coverslips with  
357 adherent cells were placed in histology tissue fixation and processing cassettes (electron  
358 microscopy sciences) and the cassettes were sequentially dipped in graded series of ethanol (30%,  
359 50%, 75%, 80%, 90%, 95% and 100%). Grades of ethanol were prepared using anhydrous ethanol,  
360 200 proof obtained from electron microscopy sciences (15058). Cells were kept in each grade of  
361 ethanol for 10 min, and the 100% ethanol step was repeated three times with fresh ethanol to ensure  
362 perfect dehydration. After this step cells were kept submerged in 100% ethanol overnight (at 4°C)  
363 and taken to Harvard center for nanoscale systems (CNS) next morning for further processing.  
364 Prior to microscopy, cells were critical point dried in a Tousimis critical point dryer, mounted on  
365 SEM sample holder and coated with heavy metal (gold/palladium) using sputter coater (Hummer)

366 and imaged in JEOL 5600 LV scanning electron microscope. Processing steps at CNS and imaging  
367 was aided by the CNS staff and facility in charge.

368

#### 369 *Transmission electron microscopy protocol*

370 For transmission electron microscopy, bacterial cell samples were collected similarly as scanning  
371 electron microscopy method. Briefly, 2 ml of bacterial culture at 0.5 OD was taken and cells were  
372 harvested by filtration. Filter containing harvested cells were immediately dipped in Karnovsky  
373 fixative, and cells were dislodged from filter by gentle pipetting. Cells in fixative were taken to  
374 CNS for further processing. At CNS, cells in fixative were centrifuged to obtain a cell pellet, and  
375 the pellet was embedded in resin and thin sections were prepared. Cut sections were mounted on  
376 EM grid and imaged using HT7800 Hitachi TEM system.

377

#### 378 *Quantification of permeability*

379 Live-cell microscopy with propidium iodide staining, as described see above, was used to measure  
380 single-cell permeability. Fluorescence signal was integrated over the entire area of each cell, as  
381 identified by thresholding in phase contrast, to calculate the total PI staining per cell of each cell  
382 per time-point. PI staining rate of each cell was fitted as a direct proportionality in the period from  
383 0 to 10 h to calculate the total permeability across the membrane. To calculate the change of  
384 permeability compared to the reference condition, we used a ‘no-flow’ chamber with 6 parallel  
385 channels, that allows us to measure permeability of five conditions and the reference condition in  
386 the same experiment.

387

#### 388 *Quantification of single-cell parameters*

389 To quantify plasmolysis, the threshold for segmentation of the bacterium was chosen such that it  
390 contains only the cytoplasm (dark area). To quantify the length of the cell envelope, the threshold  
391 was increased, such that the cell envelope (light grey are) was included in the segmentation. Both  
392 thresholding techniques are semi-quantitative, as the exact boundary of the outer and inner  
393 membrane cannot be resolved with phase microscopy, but they circumvent the problems generated  
394 by potentially toxic membrane stains.

395



396 The Fluorescence signal from DiBac3(4) and propidium iodide was integrated over the entire  
397 segmented bacterium and normalized to the cell area to correct for differences in cell size. The  
398 time-point of depolarization and permeabilization was determined by the first time the signal  
399 reached a threshold. For depolarization, the threshold was chosen to be the local minimum of the  
400 bimodal histogram of DiBac3(4) signals of all cells throughout seven days of starvation. For  
401 propidium iodide, the threshold was chosen manually. The threshold is indicated in the example  
402 dynamics of individual cells in Fig. S4 and S8.

403

404 To align single-cell stretching and biomass loss, we searched in the vicinity of the time-point of  
405 depolarization for the largest increase in length and the largest decrease in biomass, respectively.  
406 The time delay between the time-point of depolarization and the time-points of stretching and  
407 biomass loss is reported in Fig. S2.

408

#### 409 *Cell size*

410 Cell volume was computed as  $V = \pi(w/2)^2(l - w) + 4/3 \pi(w/2)^3$  where  $w$  and  $l$  are width  
411 and length of each cell, whose shape was considered as a cylinder (with radius  $w/2$  and height  
412 equal to  $(l - w)$ ) with two semi-spheres at the ends (with radius  $w/2$ ). Surface area was calculated  
413 analogously as  $S = 4\pi(w/2)^2 + w/2(l - w)$ . Because cell width only changes marginally in the  
414 FtsZ titration, we assumed it to be constant and took the formulas of  $S$  and  $V$  at wild-type width to  
415 plot the length dependence of surface and volume in Fig. 3.

416

417 **References**

- 418 1. Stevenson, L. H. A case for bacterial dormancy in aquatic systems. *Microb Ecol* **4**, 127–133  
419 (1977).
- 420 2. Amy, P. S. & Morita, R. Y. Starvation-Survival Patterns of Sixteen Freshly Isolated Open-  
421 Ocean Bacteria. *Applied and Environmental Microbiology* **45**, 1109–1115 (1983).
- 422 3. Siegele, D. A. & Kolter, R. Life after log. *J Bacteriol* **174**, 345–348 (1992).
- 423 4. De Nobili, M., Contin, M., Mondini, C. & Brookes, P. C. Soil microbial biomass is triggered  
424 into activity by trace amounts of substrate. *Soil Biology and Biochemistry* **33**, 1163–1170  
425 (2001).
- 426 5. Hoehler, T. M. & Jørgensen, B. B. Microbial life under extreme energy limitation. *Nat Rev*  
427 *Microbiol* **11**, 83–94 (2013).
- 428 6. Reese, A. T. *et al.* Microbial nitrogen limitation in the mammalian large intestine. *Nat*  
429 *Microbiol* **3**, 1441–1450 (2018).
- 430 7. Lange, R. & Hengge-Aronis, R. Identification of a central regulator of stationary-phase gene  
431 expression in *Escherichia coli*. *Molecular Microbiology* **5**, 49–59 (1991).
- 432 8. Farewell, A., Diez, A. A., DiRusso, C. C. & Nyström, T. Role of the *Escherichia coli* FadR  
433 regulator in stasis survival and growth phase-dependent expression of the *uspA*, *fad*, and  
434 *fab* genes. *J Bacteriol* **178**, 6443–6450 (1996).
- 435 9. Reeve, C. A., Bockman, A. T. & Matin, A. Role of protein degradation in the survival of  
436 carbon-starved *Escherichia coli* and *Salmonella typhimurium*. *Journal of Bacteriology* **157**,  
437 758–763 (1984).

- 438 10. Almirón, M., Link, A. J., Furlong, D. & Kolter, R. A novel DNA-binding protein with regulatory  
439 and protective roles in starved *Escherichia coli*. *Genes Dev* **6**, 2646–2654 (1992).
- 440 11. Finkel, S. E. Long-term survival during stationary phase: evolution and the GASP phenotype.  
441 *Nat Rev Microbiol* **4**, 113–120 (2006).
- 442 12. Gefen, O., Fridman, O., Ronin, I. & Balaban, N. Q. Direct observation of single stationary-  
443 phase bacteria reveals a surprisingly long period of constant protein production activity.  
444 *PNAS* **111**, 556–561 (2014).
- 445 13. Basta, D. W., Bergkessel, M. & Newman, D. K. Identification of Fitness Determinants during  
446 Energy-Limited Growth Arrest in *Pseudomonas aeruginosa*. *mBio* **8**, e01170-17 (2017).
- 447 14. Wilson, G. S. & Topley, W. W. C. *The principles of bacteriology and immunity*. (W. Wood &  
448 company, 1929).
- 449 15. Gay, F. P. *Agents of disease and host resistance*. (1935).
- 450 16. Steinhaus, E. A. & Birkeland, J. M. Studies on the Life and Death of Bacteria. *J Bacteriol* **38**,  
451 249–261 (1939).
- 452 17. Schink, S. J., Biselli, E., Ammar, C. & Gerland, U. Death Rate of *E. coli* during Starvation Is Set  
453 by Maintenance Cost and Biomass Recycling. *Cell Systems* **9**, 64-73.e3 (2019).
- 454 18. Reeve, C. A., Amy, P. S. & Matin, A. Role of protein synthesis in the survival of carbon-  
455 starved *Escherichia coli* K-12. *Journal of Bacteriology* **160**, 1041–1046 (1984).
- 456 19. Phaiboun, A., Zhang, Y., Park, B. & Kim, M. Survival Kinetics of Starving Bacteria Is Biphasic  
457 and Density-Dependent. *PLOS Computational Biology* **11**, e1004198 (2015).

- 458 20. Biselli, E., Schink, S. J. & Gerland, U. Slower growth of *Escherichia coli* leads to longer  
459 survival in carbon starvation due to a decrease in the maintenance rate. *Molecular Systems*  
460 *Biology* **16**, e9478 (2020).
- 461 21. Shi, H. *et al.* Starvation induces shrinkage of the bacterial cytoplasm. *Proc Natl Acad Sci USA*  
462 **118**, e2104686118 (2021).
- 463 22. Alberts, B. *et al.* *Molecular Biology of the Cell*. (Garland Science, 2002).
- 464 23. Chang, R. *Physical Chemistry for the Chemical and Biological Sciences*. (University Science  
465 Books, 2000).
- 466 24. Johnson, R. M. Membrane stress increases cation permeability in red cells. *Biophysical*  
467 *Journal* **67**, 1876–1881 (1994).
- 468 25. Geddes, D. M., Cargill, R. S. & LaPlaca, M. C. Mechanical Stretch to Neurons Results in a  
469 Strain Rate and Magnitude-Dependent Increase in Plasma Membrane Permeability. *Journal*  
470 *of Neurotrauma* **20**, 1039–1049 (2003).
- 471 26. Slomka, N. & Gefen, A. Relationship Between Strain Levels and Permeability of the Plasma  
472 Membrane in Statically Stretched Myoblasts. *Ann Biomed Eng* **40**, 606–618 (2012).
- 473 27. Kramers, H. A. Brownian motion in a field of force and the diffusion model of chemical  
474 reactions. *Physica* **7**, 284–304 (1940).
- 475 28. Richey, B. *et al.* Variability of the intracellular ionic environment of *Escherichia coli*.  
476 Differences between in vitro and in vivo effects of ion concentrations on protein-DNA  
477 interactions and gene expression. *Journal of Biological Chemistry* **262**, 7157–7164 (1987).

- 478 29. Palacios, P., Vicente, M. & Sánchez, M. Dependency of Escherichia coli cell-division size, and  
479 independency of nucleoid segregation on the mode and level of ftsZ expression. *Mol*  
480 *Microbiol* **20**, 1093–1098 (1996).
- 481 30. Sánchez-Gorostiaga, A. *et al.* Life without Division: Physiology of Escherichia coli FtsZ-  
482 Deprived Filaments. *mBio* **7**, e01620-16 (2016).
- 483 31. Soupene, E. *et al.* Physiological Studies of Escherichia coli Strain MG1655: Growth Defects  
484 and Apparent Cross-Regulation of Gene Expression. *J Bacteriol* **185**, 5611–5626 (2003).
- 485 32. Csonka, L. N., Ikeda, T. P., Fletcher, S. A. & Kustu, S. The accumulation of glutamate is  
486 necessary for optimal growth of Salmonella typhimurium in media of high osmolality but  
487 not induction of the proU operon. *Journal of Bacteriology* **176**, 6324–6333 (1994).
- 488 33. Basan, M. *et al.* Overflow metabolism in Escherichia coli results from efficient proteome  
489 allocation. *Nature* **528**, 99–104 (2015).
- 490 34. Carpenter, A. E. *et al.* CellProfiler: image analysis software for identifying and quantifying  
491 cell phenotypes. *Genome Biol* **7**, R100 (2006).
- 492 35. Bon, P., Maucort, G., Wattellier, B. & Monneret, S. Quadriwave lateral shearing  
493 interferometry for quantitative phase microscopy of living cells. *Opt Express* **17**, 13080–  
494 13094 (2009).
- 495 36. Liu, X., Oh, S., Peshkin, L. & Kirschner, M. W. Computationally enhanced quantitative phase  
496 microscopy reveals autonomous oscillations in mammalian cell growth. *Proc Natl Acad Sci U*  
497 *S A* **117**, 27388–27399 (2020).
- 498 37. Barer, R. & Joseph, S. Refractometry of Living Cells : Part I. Basic Principles. *Journal of Cell*  
499 *Science* **s3-95**, 399–423 (1954).
